1 **Antidepressant and antipsychotic drug prescribing and complications of diabetes: a**  
2 **systematic review of observational studies**

3

4 Charlotte R L Greene<sup>1</sup>, Hanna Ward-Penny<sup>2</sup>, Marianna F Ioannou<sup>2</sup>, Sarah H Wild<sup>1</sup>, Honghan Wu<sup>1,3</sup>,  
5 Daniel J Smith<sup>4</sup>, Caroline A Jackson<sup>1\*</sup>

6

7 <sup>1</sup>Usher Institute, University of Edinburgh, Teviot Place, Edinburgh, EH8 9AG

8 <sup>2</sup>Edinburgh Medical School, University of Edinburgh, The Chancellor's Building, Edinburgh

9 Bioquarter, 49 Little France Crescent, Edinburgh, EH16 4SB

10 <sup>3</sup>Institute of Health Informatics, University College London, 222 Euston Road, London, NW1 2DA

11 <sup>4</sup>Centre for Clinical Brain Sciences, University of Edinburgh, The Chancellor's Building, Edinburgh

12 Bioquarter, 49 Little France Crescent, Edinburgh, EH16 4SB

13

14 \*Corresponding author:

15 Dr Caroline Jackson, [caroline.jackson@ed.ac.uk](mailto:caroline.jackson@ed.ac.uk), Tel: +44 (131) 6503223

16

17

18 **Abstract**

19 **Aims**

20 Psychotropic medication may be associated with adverse effects, particularly in people with  
21 diabetes. We conducted a systematic review of observational studies investigating the association  
22 between antidepressant or antipsychotic drug prescribing and diabetes outcomes.

23 **Methods**

24 We systematically searched PubMed, EMBASE, and PsycINFO to 15<sup>th</sup> August 2022 to identify eligible  
25 studies. We used the Newcastle-Ottawa scale to assess study quality and performed a narrative  
26 synthesis.

27 **Results**

28 We included 18 studies, 14 reporting on antidepressants and four on antipsychotics. There were 11  
29 cohort studies, one self-controlled before and after study, two case-control studies, and four cross-  
30 sectional studies, of variable quality and highly heterogeneous in terms of study population,  
31 exposure definition and outcome analysed. Antidepressant prescribing may be associated with  
32 increased risk of macrovascular outcomes, whilst evidence on antidepressant and antipsychotic  
33 prescribing and glycaemic control was mixed. Few studies reported on microvascular complications  
34 and cardiometabolic factors other than glycaemic control and just one study reported on  
35 antipsychotics and diabetes complications.

36 **Conclusions**

37 There has been little study of antidepressant and antipsychotic drug prescribing in relation to  
38 diabetes outcomes. Further, more methodologically robust, research is needed to inform and  
39 enhance antidepressant and antipsychotic drug prescribing and monitoring practices in people with  
40 diabetes.

41

42 **Keywords:** Diabetes mellitus; diabetes outcomes; diabetes complications; antidepressant  
43 medication; antipsychotic medication; systematic review

## 44 **1.1 Introduction**

45 Antidepressant and antipsychotic drugs are common psychotropic medications used in treating  
46 mental illness such as major depression, bipolar disorder, and schizophrenia [1, 2], with prescribing  
47 having increased in high income countries in recent years [3, 4]. This may be partly driven by longer  
48 treatment duration, but also by more frequent use, including for other indications (such as  
49 agitation and aggression in autism spectrum disorder and dementia [5] and chronic pain, migraines,  
50 and insomnia [6]). This increased use of psychotropic drugs is of particular concern given that they  
51 appear to be associated with risk factors for cardiovascular disease and type 2 diabetes such as  
52 obesity, insulin resistance, and dyslipidaemia [7, 8], as well as major cardiovascular events such as  
53 coronary heart disease and stroke [9, 10].

54 These adverse effects must be considered in the context of their use among people with diabetes,  
55 including the bidirectional links between mental illness and diabetes [11] and the use of tricyclic  
56 antidepressants (TCA) to treat neuropathic pain occurring as a complication of diabetes [12].

57 Previous reviews have summarised evidence from experimental studies on the effect of  
58 antidepressants on cardiometabolic risk factors in people with diabetes [13, 14]. Although these  
59 reviews concluded that some antidepressant subtypes may be associated with improved glycaemic  
60 control, the overall evidence was inconclusive, in part due to low study quality, small sample sizes,  
61 and insufficient follow-up to adequately investigate longer-term outcomes such as vascular  
62 morbidity or mortality.

63 To our knowledge there is no previous systematic review of observational studies reporting the  
64 association between antidepressant or antipsychotic drugs and diabetes outcomes. We therefore  
65 conducted a systematic review of observational studies in people with diabetes that examined the  
66 association between antidepressant or antipsychotic drug prescribing and clinical complications of  
67 diabetes (including cardiovascular and microvascular morbidity), mortality, or cardiometabolic risk  
68 factors.

69

70 **2.1 Materials and methods**

71 This review is reported in accordance with the PRISMA guidelines. The review protocol was not  
72 registered

73 **1.2.1 Data sources and searches**

74 We searched PubMed, EMBASE, and PsycINFO from point of inception to August 15<sup>th</sup> 2022 using a  
75 comprehensive electronic search strategy (Supplemental appendix 1).

76 **1.2.2 Study selection**

77 We included cohort, case-control, self-controlled or cross-sectional studies conducted among adults  
78 with type 2 diabetes that examined the association between prescribing of any antidepressant  
79 and/or antipsychotic prescribing versus no prescribing in relation to diabetes outcomes  
80 (macrovascular or microvascular complications; all-cause mortality; or cardiometabolic risk factors  
81 [glycaemic control; blood pressure; or lipid levels]). See Supplemental Table 1 for a detailed  
82 summary of the inclusion criteria. We did not limit our search to studies published in the English  
83 language, but ultimately only included English language articles.

84 Two reviewers (CRLG and HWP or MFI and CAJ) independently screened titles and abstracts and the  
85 full-text of potentially eligible articles and extracted information on study and population  
86 characteristics, exposure and outcome/case definitions, statistical methods, and results from  
87 included articles. Disagreements about suitability for inclusion or data extracted were resolved  
88 through discussion with a third reviewer (CAJ or SHW).

89 **1.2.3 Quality assessment**

90 Two reviewers (CRLG and HWP or MFI and CAJ) assessed methodological study quality using the  
91 Newcastle-Ottawa scale [15]. This assesses the quality of observational studies across eight items  
92 within three domains: (i) the selection of the study groups; (ii) the comparability of the groups; (iii)  
93 the ascertainment of either the outcome or exposure of interest, where relevant.

94 **1.2.4 Data synthesis and analysis**

95 We performed a narrative synthesis since substantial clinical and methodological heterogeneity  
96 between studies precluded meta-analysis.

97

## 98 **3.0 RESULTS**

### 99 **3.1 Study characteristics**

100 Our search yielded 11,216 articles, with 19 eligible articles representing 18 studies ultimately  
101 included (Figure 1).

102 Study characteristics are described in Table 1. Details of the antidepressant and antipsychotic drugs  
103 included with each study are given in Supplemental Table 2. Eleven studies were cohort [16-26], one  
104 was a self-controlled before and after study [27], two were case-control [28, 29], and four were  
105 cross-sectional studies [30-33]. Two studies included overlapping study populations [21, 27], but  
106 adopted different study designs to address a similar question and so both were included in the  
107 narrative synthesis. There was considerable heterogeneity between studies in terms of study  
108 population, exposure definitions and outcomes analysed. All studies were from high-income  
109 settings. Study populations were most frequently derived from people with newly diagnosed  
110 diabetes in the general population. Two studies included a study population with comorbid mental  
111 illness and diabetes (one with depression [25] and one with schizophrenia [24]).

### 112 **3.2 Quality assessment**

113 Methodological study quality ranged from three to eight out of nine stars (Supplemental Table 3).

114 Concerns arising in some studies included: poor comparability due to insufficient adjustment for

115 relevant confounders including confounding by indication; use of self-report for exposure and/or

116 outcome assessment; poor representativeness of the population; low precision due to small sample

117 sizes; and no description of the response rate and/or attrition (where applicable).

### 118 **3.3 Antidepressant prescribing and diabetes outcomes**

#### 119 **3.3.1 Diabetes complications**

120 Of 14 studies reporting on antidepressant prescribing, 8 reported associations with complications  
121 (largely macrovascular) of diabetes, comprising 6 cohort studies [17-20, 25, 26] and two cross-  
122 sectional studies [30, 33] (Table 2 and Supplementary Table 4a). Outcomes were heterogeneous and  
123 findings were mixed.

124 Receipt of antidepressant prescriptions, in comparison to no record of anti-depressant prescribing,  
125 was associated with higher crude incidence of myocardial infarction (MI) [20] and of a composite  
126 macrovascular outcome [25]. However, lack of adjustment for age, sex and other factors that may  
127 differ between groups limits conclusions from these studies. A third cohort study found that  
128 selective serotonin reuptake inhibitor (SSRI) antidepressant prescribing was associated with  
129 increased risk of 30-day post-stroke mortality [26], with the excess risk greatest for people whose  
130 SSRI prescription was initiated shortly before stroke. A cross-sectional study of older men of low-  
131 income from one treatment centre reported greater odds of a composite cardiovascular morbidity  
132 outcome and of MI specifically in crude analyses without control of confounding factors [30]. In  
133 contrast, a cohort study with a median of 9.6 years follow-up derived from post-hoc analyses of a  
134 clinical trial for a weight loss intervention [19] reported that antidepressant prescribing was  
135 associated with reduced cardiovascular morbidity or mortality in women, but not men. Risk of  
136 peripheral artery disease was reported to be similar in those with diabetes prescribed versus not  
137 prescribed antidepressants [18]. Finally, the only cohort study to describe microvascular  
138 complications reported higher crude incidence of a composite microvascular outcome in people  
139 prescribed anti-depressants among a Taiwanese cohort of people newly treated for diabetes [25],  
140 whilst a small cross-sectional study of people with a diagnosis of diabetes or with HbA1c 6.5% who  
141 took part in the National Health and Nutrition Examination Survey in the US found that self-reported  
142 antidepressant was associated with lower odds of retinopathy compared to people not reporting  
143 anti-depressant use after adjusting for sociodemographic and clinical characteristics [33] (Table 2).  
144 Supplemental Table 5a includes details of additional results reported in some studies, including

145 investigations of variations of composite outcomes, interactions and associations by antidepressant  
146 drug subtypes, with findings generally consistent with primary results.

### 147 **3.3.2 Glycaemic control**

148 Six studies reported on antidepressant prescribing in relation to glycaemic control [16, 21, 22, 27, 29,  
149 31], with mixed findings. Of the three cohort studies, two reported no statistically significant  
150 difference in the association between antidepressant prescribing and optimal glycaemic control [21,  
151 22]. The third study reported that antidepressant use was associated with lower risk of sub-optimal  
152 glycaemic control [16]. Interestingly, a pre-post study reported lower HbA1c levels following  
153 antidepressant medication initiation [27]. One cohort study also reported that receipt of  
154 antidepressants was associated with increased odds of prescribing of glucose lowering drugs (GLDs)  
155 [21]. Similarly, a case-control study found that among people with newly diagnosed diabetes,  
156 current receipt of SSRI antidepressant prescriptions was associated with a more than two-fold  
157 increased risk of insulin prescription [29]. Similar associations were observed for other  
158 antidepressant classes and for other durations, with no associations observed for past prescriptions  
159 (Table 2). A cross-sectional study among people from low-income areas found that antidepressant  
160 prescribing from multiple classes was associated with higher values of HbA1c, after adjustment for  
161 depression severity [31], whereas there was no association between individual antidepressant class  
162 prescribing and HbA1c levels.

### 163 **3.3.3 Lipid profile and lipid-lowering treatment**

164 One cohort study found that antidepressant prescribing was associated with abnormal lipid profiles  
165 or receipt of lipid-lowering medication [22], whereas a second reported that antidepressant  
166 prescribing may have a small protective effect on cholesterol levels [21], with findings broadly  
167 consistent by prescription timing and across antidepressant subtypes (Supplemental Table 5a).

## 168 **3.4 Antipsychotic prescribing and diabetes outcomes**

### 169 **3.4.1 Diabetes complications**

170 Just four studies reported on antipsychotic prescribing in relation to diabetes outcomes. The two  
171 studies that investigated the association between antipsychotic prescribing and clinical  
172 complications of diabetes used population-based national registers [24, 32]. A cohort study of  
173 people with schizophrenia found that, compared to no antipsychotic prescribing, regular  
174 antipsychotic prescribing was associated with a 20% and 27% reduced risk of cardiovascular  
175 morbidity, and all-cause mortality, respectively [24] (Table 3). There was no clear evidence of an  
176 association between antipsychotics and microvascular complications. When stratifying by metabolic  
177 risk of antipsychotics, the authors found that drugs considered to have an intermediate or high  
178 metabolic risk were associated with a significantly reduced risk of all complications including  
179 cardiovascular and microvascular morbidity (Supplemental Table 5b).

180 A second, cross-sectional, study found that the prevalence of retinopathy was lower in people who  
181 had been prescribed antipsychotics for a total of more than 12 months than in a comparison group  
182 matched for age, sex, diabetes type and duration, body mass index and smoking status that had not  
183 been prescribed antipsychotics (Table 3) [32].

184 Two studies reported a link between that antipsychotic prescribing and poorer glycaemic control  
185 [23, 28], and one reported the opposite finding [32]. The only cohort study [23] found that receipt of  
186 antipsychotic prescriptions within the first two years of diabetes diagnosis was associated with a  
187 two-fold increased risk of first insulin prescription, which attenuated to a 30% increased risk after  
188 adjustment for other drug prescriptions (Table 3). In a case-control study of older adults, receipt of  
189 an antipsychotic prescription in the previous 180 days was associated with an increased risk of  
190 hospitalisation for hyperglycaemia, regardless of diabetes medication type [28]. This effect was  
191 strongest among those receiving a first prescription of antipsychotics (Table 3) and consistent across  
192 antipsychotic subtypes (Supplemental Table 4b). In contrast, a cross-sectional study found that mean  
193 HbA1c values were significantly lower in people prescribed antipsychotics for more than 12 months  
194 in total than in those who never received antipsychotics [32].

### 195 **3.4.3 Other cardiovascular risk factors**



196 Antipsychotic prescribing was also associated with significantly lower systolic and diastolic blood  
197 pressure and total cholesterol although absolute differences were small (Supplemental Table 5b).

#### 198 **4.1 DISCUSSION**

199 Our review revealed that few observational studies have investigated the association between  
200 antidepressant and antipsychotic drug prescribing and diabetes outcomes. Studies of associations  
201 with microvascular complications and cardiometabolic factors other than glycaemic control and the  
202 association between antipsychotic prescribing and any diabetes complication were particularly  
203 limited. The published studies are highly heterogeneous, particularly in terms of the study  
204 population, exposure definitions, and outcomes. Lack of comparability and study shortcomings  
205 highlight key gaps and limit conclusions. Tentative conclusions are that, among people with diabetes,  
206 antidepressant prescribing may be associated with an increased risk of cardiovascular morbidity or  
207 mortality, and both antidepressant and antipsychotic prescribing may be linked to poorer glycaemic  
208 control, but the evidence is very mixed.

#### 209 **4.1 Strengths and limitations**

210 To the best of our knowledge this is the first systematic review of observational studies reporting  
211 associations between antidepressant or antipsychotic drug prescribing and complications, mortality,  
212 or cardiometabolic risk factors in people with diabetes. Other strengths include our use of a detailed  
213 and comprehensive search strategy applied to three bibliographic databases, independent screening  
214 and data extraction by two reviewers, and assessment of study quality.

215 A limitation of this review is the exclusion of outcomes related to weight changes and obesity, that  
216 have previously been linked to antidepressant and antipsychotic use [34, 35], as these outcomes  
217 were beyond the scope of our review. Also beyond our scope were studies which reported on  
218 progression of diabetes complications or compared prescribing of one psychotropic drug versus  
219 another. The latter is particularly important when investigating adverse effects of antidepressant  
220 and antipsychotic prescribing in people with SMI, where given the clinical need to prescribe,  
221 comparison of type of medication becomes more important than comparison of use versus non-use.

222 We recommend that future reviews examine this topic in greater depth by focusing on study  
223 populations with comorbid SMI and diabetes only.

224 Further limitations of this review reflect the limitations of existing studies. Many of these have  
225 insufficient control of confounding factors, including lifestyle behaviours, socioeconomic status, and  
226 critically, confounding by indication, particularly for mental illness. It is difficult to estimate how the  
227 latter might have affected estimates with potential bias in both directions. Mental illness is  
228 associated with higher risk of poor diabetes outcomes [36-38], partly through higher prevalence of  
229 unhealthy lifestyle factors, including overweight/obesity, lower socioeconomic status [39], poorer  
230 treatment adherence, and in some settings, receipt of sub-optimal care [39]. Conversely, in other  
231 settings, people with comorbid mental illness and diabetes may be more likely than people with  
232 diabetes without mental illness to receive optimal routine monitoring of certain care indicators [40],  
233 perhaps due to more frequent visits to their primary care practitioner [41].

234 Although ascertainment of prescriptions through electronic records minimises information bias and  
235 loss to follow-up, prescribing records do not reflect actual drug use. For studies where exposure  
236 status was identified using interviews or assessment visits, this information may be subject to social  
237 desirability and recall biases. Misclassifying people as exposed, either where people do not take  
238 drugs as prescribed or fail to disclose the drugs prescribed, would weaken effect estimates. Similarly,  
239 electronic records often only include outcomes resulting in hospitalisation and may also be subject  
240 to misclassification bias.

241 Some studies had low precision due to small sample sizes, which affects interpretation of effect  
242 estimates, especially for less common microvascular complications, as well as for the investigation of  
243 differences by drug subtypes.

244 Finally, in anticipation of limited evidence, we included cross-sectional studies in our review. It is  
245 however possible that diabetes complications increase the risk of a person developing mental illness,  
246 such as depression [36], and in turn the likelihood of being prescribed antidepressant or  
247 antipsychotic medications.

## 248 **4.2 Interpretation of findings: antidepressants**

249 Our findings on antidepressant use and reduced risk of cardiovascular morbidity or mortality in  
250 people with diabetes contrasts with previous reviews which report the opposite in general  
251 populations that included people with and without diabetes [9, 42]. These contrasting findings may  
252 reflect key differences in associations for different population sub-groups. Indeed, pooled results of  
253 only studies including people with, or at high risk of, cardiovascular disease similarly found that  
254 antidepressant use/prescribing was associated with a statistically non-significant reduced risk of  
255 cardiovascular morbidity [42]. Systematic reviews of trials suggest that SSRI use can improve short-  
256 term glycaemic control in people with diabetes [13, 14]. Some of the observational studies we  
257 identified found similar results but others found no differences in glycaemic control between groups,  
258 perhaps related to study population, design, sample size and approaches to control of confounding.

## 259 **4.3 Interpretation of findings: antipsychotics**

260 Our review revealed the sparse evidence on antipsychotic prescribing and diabetes outcomes.  
261 Although based on just one cohort study [24], the association between antipsychotic prescribing and  
262 lower mortality risk in people with schizophrenia and diabetes aligns with findings on antipsychotic  
263 use and lower long-term mortality in people with schizophrenia [43, 44] and short-term mortality in  
264 the general population [45]. However, in contrast to previous reports of a link between antipsychotic  
265 use and increased risk of cardiovascular disease in general populations [10, 46], this cohort study  
266 found the opposite. Although counter-intuitive, given their adverse metabolic and cardiovascular  
267 effects [8, 34, 47], antipsychotic use alongside psychological support in people with SMI may  
268 improve physical and psychosocial functioning, thereby improving lifestyle and compliance with  
269 diabetes care and treatment, which in turn could reduce risk of diabetes complications. . The few  
270 studies on antipsychotic prescribing suggest an association with increased risk of poorer glycaemic  
271 control, which aligns with established adverse glycaemic effects of some antipsychotics [48].

## 272 **4.4 Implications**

273 The sparse existing literature on the association between antidepressant and antipsychotic  
274 prescribing and diabetes outcomes limits our conclusions and implications for practice. There are  
275 major gaps that should be addressed in future research in order to inform clinical practice. The  
276 increased use of antidepressant and antipsychotic medications in the general population is  
277 concerning given the evident lack of understanding of potential for adverse effects and increasing  
278 prevalence of diabetes. The striking gap in the evidence on antipsychotic drug prescribing in relation  
279 to diabetes outcomes in particular should be urgently addressed. Antidepressant and antipsychotic  
280 drugs are an essential component of the treatment of mental health conditions, and timely  
281 treatment in people with diabetes is crucial, given the poor diabetes outcomes for people with both  
282 diabetes and mental ill health [49]. It is therefore important to establish treatment-associated risks  
283 of diabetes outcomes within population sub-groups to inform and enhance drug prescribing and  
284 monitoring practices for diabetes and its complications. To improve upon existing studies and  
285 advance our understanding, future studies should: be well-powered (particularly to investigate  
286 differences); include information on mental illness, lifestyle, and other confounding factors;  
287 distinguish between drug subtypes; assess whether and how risk changes over time; and consider  
288 the potential effects of cumulative exposures.

#### 289 **4.5 Conclusions**

290 Few studies have described the association between antidepressant and antipsychotic medications  
291 and diabetes outcomes, with shortcomings and mixed findings limiting the ability to draw  
292 conclusions. While future research addresses this evidence gap, clinicians, including diabetologists,  
293 primary care practitioners, and where appropriate, psychiatrists, should attempt to ensure regular  
294 monitoring of cardiometabolic risk factors and early indicators of complications in people with  
295 diabetes who are being treated with antidepressant or antipsychotic medication (irrespective of  
296 indication).

297

## **Funding**

None of the authors or their institutions received any payments or services in the past 36 months from a third party that could be perceived to influence, or give the appearance of potentially influencing, the submitted work.

**Conflict of interest:** None. None of the authors or their institutions at any time received payment or services from a third party for any aspect of the submitted work.

## REFERENCES

- [1] National Institute for Health and Care Excellence. BNF treatment summary: Antidepressant drugs [Internet]. 2021 [cited 2022 Nov]. Available from: <https://bnf.nice.org.uk/treatment-summary/antidepressant-drugs.html>
- [2] National Institute for Health and Care Excellence. BNF treatment summary: Psychoses and related disorders [Internet]. 2021 [cited 2022 Nov Jan]. Available from: <https://bnf.nice.org.uk/treatment-summary/psychoses-and-related-disorders.html>
- [3] Hafferty JD, Wigmore EM, Howard DM, Adams MJ, Clarke TK, Campbell AI, et al. Pharmacoeconomics of antidepressant exposure in a UK cohort record-linkage study. *J. Psychopharmacol.* 2019;33:482-93.
- [4] Hálfðánarson Ó, Zoëga H, Aagaard L, Bernardo M, Brandt L, Fusté AC, et al. International trends in antipsychotic use: A study in 16 countries, 2005-2014. *Eur Neuropsychopharmacol.* 2017;27:1064-76.
- [5] Carton L, Cottencin O, Lapeyre-Mestre M, Geoffroy PA, Favre J, Simon N, et al. Off-Label Prescribing of Antipsychotics in Adults, Children and Elderly Individuals: A Systematic Review of Recent Prescription Trends. *Curr Pharml Des.* 2015;21:3280-97.
- [6] Wong J, Motulsky A, Abrahamowicz M, Egualé T, Buckeridge DL, Tamblyn R. Off-label indications for antidepressants in primary care: descriptive study of prescriptions from an indication based electronic prescribing system. *BMJ.* 2017;356:j603.
- [7] Barnard K, Peveler RC, Holt RI. Antidepressant medication as a risk factor for type 2 diabetes and impaired glucose regulation: systematic review. *Diabetes care.* 2013;36:3337-45.
- [8] Rognoni C, Bertolani A, Jommi C. Second-Generation Antipsychotic Drugs for Patients with Schizophrenia: Systematic Literature Review and Meta-analysis of Metabolic and Cardiovascular Side Effects. *Clin Drug Investig.* 2021;41:303-19.

- [9] Biffi A, Scotti L, Corrao G. Use of antidepressants and the risk of cardiovascular and cerebrovascular disease: a meta-analysis of observational studies. *Eur J Clin Pharmacol*. 2017;73:487-97.
- [10] Zivkovic S, Koh CH, Kaza N, Jackson CA. Antipsychotic drug use and risk of stroke and myocardial infarction: a systematic review and meta-analysis. *BMC Psych*. 2019;19:189.
- [11] Vancampfort D, Correll CU, Galling B, Probst M, De Hert M, Ward PB, et al. Diabetes mellitus in people with schizophrenia, bipolar disorder and major depressive disorder: a systematic review and large scale meta-analysis. *World Psychiatry*. 2016;15:166-74.
- [12] National Institute for Health and Care Excellence. BNF treatment summary: Neuropathic pain. 2021 [cited 2022 Nov]. Available from: <https://bnf.nice.org.uk/treatment-summary/neuropathic-pain.html>
- [13] Baumeister H, Hutter N, Bengel J. Psychological and pharmacological interventions for depression in patients with diabetes mellitus and depression. *The Cochrane database Sys Rev*. 2012;12:Cd008381.
- [14] Roopan S, Larsen ER. Use of antidepressants in patients with depression and comorbid diabetes mellitus: a systematic review. *Acta Neuropsychiatrica*. 2017;29:127-39.
- [15] Wells G, Shea B, O'Connell D, Robertson J, Peterson J, Welch V. The Newcastle-Ottawa Scale (NOS) for assessing the quality of nonrandomised studies in meta-analyses. [cited 2022 Nov]. [http://www.evidencebasedpublichealth.de/download/Newcastle\\_Ottawa\\_Scale\\_Pope\\_Bruce.pdf](http://www.evidencebasedpublichealth.de/download/Newcastle_Ottawa_Scale_Pope_Bruce.pdf)
- [16] Brieler J, Salas J, Scherrer J. Achievement of glycemic control and antidepressant medication use in comorbid depression and type II diabetes. *Annals Family Medicine*. 2022;20.
- [17] Chen AC, Huang KL, Chen HM, Chen PC, Chen VC, Chiu WC. Antidepressants and the risk of myocardial infarction among patients with diabetes: A population-based cohort study. *Journal of Affective Disorders*. 2021;294:109-14.

- [18] Chen KH, Wang TY, Lee CP, Yang YH, McIntyre RS, Subramaniapillai M, et al. Association between selective serotonin reuptake inhibitor and risk of peripheral artery disease in diabetes mellitus: Propensity score matching and landmark analysis. *Medicine*. 2022;101:e29202.
- [19] Hazuda HP, Gaussoin SA, Wing RR, Yanovski SZ, Johnson KC, Coday M, et al. Long-term Association of Depression Symptoms and Antidepressant Medication Use With Incident Cardiovascular Events in the Look AHEAD (Action for Health in Diabetes) Clinical Trial of Weight Loss in Type 2 Diabetes. *Diabetes Care*. 2019;42:910-8.
- [20] Rådholm K, Wiréhn AB, Chalmers J, Östgren CJ. Use of antidiabetic and antidepressant drugs is associated with increased risk of myocardial infarction: a nationwide register study. *Diabetic Medicine*. 2016;33:218-23.
- [21] Rohde C, Knudsen JS, Schmitz N, Østergaard SD, Thomsen RW. The impact of hospital-diagnosed depression or use of antidepressants on treatment initiation, adherence and HbA(1c)/LDL target achievement in newly diagnosed type 2 diabetes. *Diabetologia*. 2021;64:361-74.
- [22] Rubin RR, Peyrot M, Gaussoin SA, Espeland MA, Williamson D, Faulconbridge LF, et al. Four-year analysis of cardiovascular disease risk factors, depression symptoms, and antidepressant medicine use in the Look AHEAD (Action for Health in Diabetes) clinical trial of weight loss in diabetes. *Diabetes Care*. 2013;36:1088-94.
- [23] Spoelstra JA, Stolk RP, Cohen D, Klungel OH, Erkens JA, Leufkens HG, et al. Antipsychotic drugs may worsen metabolic control in type 2 diabetes mellitus. *Journal Clin Psych*. 2004;65:674-8.
- [24] Wu CS, Gau SS. Association Between Antipsychotic Treatment and Advanced Diabetes Complications Among Schizophrenia Patients With Type 2 Diabetes Mellitus. *Schizophrenia Bulletin*. 2016;42:703-11.
- [25] Wu CS, Hsu LY, Pan YJ, Wang SH. Associations Between Antidepressant Use and Advanced Diabetes Outcomes in Patients with Depression and Diabetes Mellitus. *J Clin Endocrinol Metab*. 2021;106:e5136-e46.



- [26] Würtz M, Schmidt M, Grove EL, Horváth-Puhó E, Christiansen CF, Sørensen HT. Preadmission use of selective serotonin reuptake inhibitors and short-term mortality in diabetic patients hospitalized due to stroke. *J Int Med.* 2016;280:407-18.
- [27] Rohde C, Thomsen RW, Østergaard SD. A Within-Subject Before-After Study of the Impact of Antidepressants on Hemoglobin A1c and Low-Density Lipoprotein Levels in Type 2 Diabetes. *J clin psychopharmacol.* 2022;42:125-32.
- [28] Lipscombe LL, Lévesque L, Gruneir A, Fischer HD, Juurlink DN, Gill SS, et al. Antipsychotic drugs and hyperglycemia in older patients with diabetes. *Archives of Internal Medicine.* 2009;169:1282-9.
- [29] Noordam R, Aarts N, Peeters RP, Hofman A, Stricker BH, Visser LE. Selective Serotonin Reuptake Inhibitors Decrease Pancreatic Insulin Secretion in Older Adults and Increase the Risk of Insulin Dependence in Type 2 Diabetes Patients. *The Journal of clinical psychiatry.* 2016;77:e1124-e9.
- [30] Higgins TS, Jr., Ritchie CS, Stetson BA, Burke JD, Looney SW. An examination of the moderating effect of treatment with anti-depressants on the association of heart disease with depression in males with type 2 diabetes attending a Veterans Affairs Medical Center. *Diabetes Res Clin Prac.* 2007;75:220-8.
- [31] Kammer JR, Hosler AS, Leckman-Westin E, DiRienzo G, Osborn CY. The association between antidepressant use and glycemic control in the Southern Community Cohort Study (SCCS). *Journal Diabetes complicat.* 2016;30:242-7.
- [32] Wake DJ, Broughton P, Perera SM, MacIntyre DJ, Leese GP. Altered metabolic parameters in association with antipsychotic medication use in diabetes: A population based case-control study. *Psychoneuroendocrinology.* 2016;66:214-20.
- [33] Yekta Z, Xie D, Bogner HR, Weber DR, Zhang X, Harhay M, et al. The association of antidepressant medications and diabetic retinopathy among people with diabetes. *Journal Diabetes complicat.* 2015;29:1077-84.

- [34] Bak M, Fransen A, Janssen J, van Os J, Drukker M. Almost all antipsychotics result in weight gain: a meta-analysis. *PLoS One*. 2014;9:e94112.
- [35] Gafoor R, Booth HP, Gulliford MC. Antidepressant utilisation and incidence of weight gain during 10 years' follow-up: population based cohort study. *BMJ*. 2018;361:k1951.
- [36] Nouwen A, Adriaanse MC, van Dam K, Iversen MM, Viechtbauer W, Peyrot M, et al. Longitudinal associations between depression and diabetes complications: a systematic review and meta-analysis. *Diabetic Medicine*. 2019;36:1562-72.
- [37] Vinogradova Y, Coupland C, Hippisley-Cox J, Whyte S, Penny C. Effects of severe mental illness on survival of people with diabetes. *BJPsych*. 2010;197:272-7.
- [38] Wu CS, Lai MS, Gau SS. Complications and mortality in patients with schizophrenia and diabetes: population-based cohort study. *BJPsych*. 2015;207:450-7.
- [39] M DEH, Correll CU, Bobes J, Cetkovich-Bakmas M, Cohen D, Asai I, et al. Physical illness in patients with severe mental disorders. I. Prevalence, impact of medications and disparities in health care. *World Psychiatry*. 2011;10:52-77.
- [40] Scheuer SH, Fleetwood KJ, Licence KAM, Mercer SW, Smith DJ, Sudlow CLM, et al. Severe mental illness and quality of care for type 2 diabetes: A retrospective population-based cohort study. *Diabetes Res Clin Prac*. 2022;190:110026.
- [41] Kontopantelis E, Olier I, Planner C, Reeves D, Ashcroft DM, Gask L, et al. Primary care consultation rates among people with and without severe mental illness: a UK cohort study using the Clinical Practice Research Datalink. *BMJ Open*. 2015;5:e008650.
- [42] Maslej MM, Bolker BM, Russell MJ, Eaton K, Durisko Z, Hollon SD, et al. The Mortality and Myocardial Effects of Antidepressants Are Moderated by Preexisting Cardiovascular Disease: A Meta-Analysis. *Psychotherapy and psychosomatics*. 2017;86:268-82.
- [43] Taipale H, Tanskanen A, Mehtälä J, Vattulainen P, Correll CU, Tiihonen J. 20-year follow-up study of physical morbidity and mortality in relationship to antipsychotic treatment in a nationwide cohort of 62,250 patients with schizophrenia (FIN20). *World Psychiatry*. 2020;19:61-8.

- [44] Vermeulen J, van Rooijen G, Doedens P, Numminen E, van Tricht M, de Haan L. Antipsychotic medication and long-term mortality risk in patients with schizophrenia; a systematic review and meta-analysis. *Psychol Med*. 2017;47:2217-28.
- [45] Schneider-Thoma J, Efthimiou O, Huhn M, Krause M, Reichelt L, Röder H, et al. Second-generation antipsychotic drugs and short-term mortality: a systematic review and meta-analysis of placebo-controlled randomised controlled trials. *Lancet Psychiat*. 2018;5:653-63.
- [46] Huang KL, Fang CJ, Hsu CC, Wu SI, Juang JJ, Stewart R. Myocardial infarction risk and antipsychotics use revisited: a meta-analysis of 10 observational studies. *J Psychopharmacol*. 2017;31:1544-55.
- [47] Stoner SC. Management of serious cardiac adverse effects of antipsychotic medications. *Ment Health Clin*. 2017;7:246-54.
- [48] Whicher CA, Price HC, Holt RIG. Mechanisms in endocrinology: Antipsychotic medication and type 2 diabetes and impaired glucose regulation. *European J Endocrinol*. 2018;178:R245-r58.
- [49] Guerrero Fernández de Alba I, Gimeno-Miguel A, Poblador-Plou B, Gimeno-Feliu LA, Ioakeim-Skoufa I, Rojo-Martínez G, et al. Association between mental health comorbidity and health outcomes in type 2 diabetes mellitus patients. *Scientific reports*. 2020;10:19583.

## Figure legends

Figure 1 Study selection flow diagram

**Table 1:** Characteristics of included studies

| First author, year, study setting  | Study population                                                                                                                                                                                                                                      | Data source                                        | Exposure definition                                                                   | Total participants [exposed   not exposed] <sup>†</sup>       | Mean age*, years (± SD)                                    | Male (%) | Outcome/case definition [follow-up duration] <sup>‡</sup>                      |
|------------------------------------|-------------------------------------------------------------------------------------------------------------------------------------------------------------------------------------------------------------------------------------------------------|----------------------------------------------------|---------------------------------------------------------------------------------------|---------------------------------------------------------------|------------------------------------------------------------|----------|--------------------------------------------------------------------------------|
| <b>COHORT STUDIES</b>              |                                                                                                                                                                                                                                                       |                                                    |                                                                                       |                                                               |                                                            |          |                                                                                |
| Spolstra, 2004 [23]<br>Netherlands | <ul style="list-style-type: none"> <li>Newly diagnosed T2DM (based on oral GLDs only); 6 cities</li> <li>Exclusions: prescribed insulin within 3 months of T2DM diagnosis</li> </ul>                                                                  | Outpatient pharmacy dispensing records             | Any versus no AP prescription                                                         | 3,001<br>[248   2,743]                                        | 63 (SE 0.24)                                               | 49       | First insulin prescription [5 years]                                           |
| Rubin, 2010, 2013 [22]<br>USA      | <ul style="list-style-type: none"> <li>Overweight/obese in weight loss trial; aged 45-76 years</li> <li>Verified self-reported T2DM</li> <li>Exclusions: SMI; poor glucose control; raised cholesterol/hypertension; failed exercise test.</li> </ul> | Trial                                              | Any versus no AD prescription (ascertained from prescriptions brought to assessments) | 5,145<br>[1,389   3,756]                                      | 59 (6.8)                                                   | 41       | Glycaemic control, insulin prescription, hypertension, dyslipidaemia [4 years] |
| Rådholm, 2015 [20]<br>Sweden       | <ul style="list-style-type: none"> <li>Aged 45-84 years with diabetes (classified by prescription of GLDs only)</li> </ul>                                                                                                                            | National registers                                 | Any versus no AD prescription; national drug register                                 | 241,787<br>[43,412   198,375]                                 | NR                                                         | NR       | First fatal/non-fatal MI; national MI register [3 years]                       |
| Brieler, 2016 [16]<br>USA          | <ul style="list-style-type: none"> <li>Aged 18-90 years with T2DM, classified by depression &amp; AD treatment status</li> <li>Exclusions: prescribed ADs for reasons other than depression.</li> </ul>                                               | Primary care data registry                         | Any versus no AD prescription                                                         | 1,399<br>[treated depression: 225   untreated depression: 40] | 62 (12.8)                                                  | 41       | Optimal glycaemic control [3 years]                                            |
| Wu, 2016 [24]<br>Taiwan            | <ul style="list-style-type: none"> <li>Schizophrenia and newly diagnosed T2DM</li> <li>Exclusions: diabetes complications (pre-existing or within 6 months of diagnosis)</li> </ul>                                                                   | National health insurance database                 | Regular and irregular AP prescription versus no AP prescription                       | 17,629<br>[irregular: 5,871; regular: 8,531   3,227]          | 47 (12.3)                                                  | 49       | CV morbidity, microvascular morbidity, all-cause mortality [11.5 years]        |
| Würtz, 2016 [26]<br>Denmark        | <ul style="list-style-type: none"> <li>T1DM or T2DM and a first-ever hospitalisation for stroke</li> </ul>                                                                                                                                            | National registers (including pharmacy dispensing) | Current, new, long-term, or former SSRI prescription versus no SSRI prescription      | 12,620<br>[current: 1,432; former: 233   10,955]              | < 60: 14.4%<br>60-69: 23.1%<br>70-79: 31.9%<br>≥ 80: 30.6% | 57       | Mortality (30 days following stroke) [30 days]                                 |
| Hazuda, 2019 [19]                  | <ul style="list-style-type: none"> <li>Overweight/obese; aged 45-76 years with verified self-reported T2DM included in a</li> </ul>                                                                                                                   | Trial                                              | Any versus no AD prescription                                                         | 5,145<br>[848   4,297]                                        | 59 (6.8)                                                   | 41       | Composite CV outcomes [median 9.6 years]                                       |

|                                |                                                                                                                                                                                                                                                       |                                                                             |                                                                                                     |                                                    |                                                                 |                           |                                                                                                |  |
|--------------------------------|-------------------------------------------------------------------------------------------------------------------------------------------------------------------------------------------------------------------------------------------------------|-----------------------------------------------------------------------------|-----------------------------------------------------------------------------------------------------|----------------------------------------------------|-----------------------------------------------------------------|---------------------------|------------------------------------------------------------------------------------------------|--|
| USA                            | weight loss trial<br>• Exclusions: SMI, poor glucose control hypertension, raised cholesterol, and failed exercise test                                                                                                                               |                                                                             | (prescriptions brought to annual assessment visits)                                                 |                                                    |                                                                 |                           |                                                                                                |  |
| Chen, 2021 [17]<br>Taiwan      | • Aged ≥50 years; diabetes diagnosed 1997-2010.<br>• Exclusions: incomplete data; history of MI before diabetes diagnosis; AD use of 1-27 cDDD during follow-up<br>• Created two cohorts: one based on total diabetes population and a matched cohort | National health insurance database                                          | AD use of >180 days versus no use and cumulative AD use ≥28 cDDD versus no AD use                   | 500,990<br>[162,057   338,933]                     | 50-59: 43%<br>60-69: 37%<br>70-79: 17%<br>≥80: 3%               | 51                        | First inpatient recorded diagnosis of MI                                                       |  |
| Rohde, 2021 [21]<br>Denmark    | • Aged ≥30 years with newly diagnosed T2DM in defined geographical area                                                                                                                                                                               | Laboratory & pharmacy dispensing datasets                                   | Current or former AD prescription versus no AD prescription                                         | 87,650<br>[current: 9,963; former: 4,809   65,101] | Current AD: median 66 (IQR 55-77); no AD: median 65 (IQR 55-74) | Current AD: 42; no AD: 60 | Optimal glycaemic control, first GLD prescription, LDL cholesterol [1 year]                    |  |
| Wu, 2021 [25]<br>Taiwan        | • Aged ≥20 years with depressive disorder (but not schizophrenia or bipolar disorder) & incident diabetes diagnosed 2001-2014<br>• No complications at 6 months post-diabetes diagnosis                                                               | National health insurance database                                          | AD use defined using an adherence measure (no use, poor use, partial use, and regular use)          | 36,276<br>[NR   NR]                                | 20-44: 27.2%<br>45-64: 55.6%<br>≥65: 17.1%                      | 39                        | Macrovascular complications; microvascular complications; all-cause mortality [median 5 years] |  |
| Chen, 2022 [18]<br>Taiwan      | • Aged ≥18 years; diabetes diagnosed 1999-2013<br>• Exclusions: record of AD use within the prior 2 years; prior PAD or venous thromboembolism or malignant neoplasm; follow-up of <1 year<br>• Additional propensity score-matched cohort included   | National health insurance database                                          | SSRI use versus no SSRI use                                                                         | 5049<br>[459   4590]                               | 18-44: 16%<br>45-64: 52%<br>≥65: 32%                            | 42                        | Peripheral artery disease [14 years]                                                           |  |
| <b>SELF-CONTROLLED STUDIES</b> |                                                                                                                                                                                                                                                       |                                                                             |                                                                                                     |                                                    |                                                                 |                           |                                                                                                |  |
| Rohde, 2022[27]<br>Denmark     | • Aged ≥30 years, in defined geographical area, with T2DM diagnosed 2000-2016, without a psychotic or bipolar disorder<br>• No AD prescription in the 100 days prior to T2DM diagnosis & redeemed a first AD prescription during follow-up            | Routinely collected health datasets, including clinical laboratory datasets | Comparison of outcome in the pre/post AD initiation period (index date being date of AD initiation) | 14,919 initiated AD medication<br>[NA]             | Median 65 (IQR 54-75)                                           | 54%                       | Mean HbA1c and LDL levels [32 months; 16 months pre-index date & 16 months post-index date]    |  |

| <b>CASE-CONTROL STUDIES</b>       |                                                                                                                                                                                                                                                                                |                                   |                                                                                                             |                                                                                                                 |                                                                     |                                                   |                                                                           |
|-----------------------------------|--------------------------------------------------------------------------------------------------------------------------------------------------------------------------------------------------------------------------------------------------------------------------------|-----------------------------------|-------------------------------------------------------------------------------------------------------------|-----------------------------------------------------------------------------------------------------------------|---------------------------------------------------------------------|---------------------------------------------------|---------------------------------------------------------------------------|
| Lipscombe, 2009 [28]<br>Canada    | <ul style="list-style-type: none"> <li>• Aged <math>\geq 66</math> years in defined geographical area with diabetes</li> <li>• Exclusions: receiving dialysis or palliative care</li> </ul>                                                                                    | Regional routine databases        | Current and recent past AP prescription versus remote AP prescription                                       | 13,817<br>[1,594 cases (current: 909; recent past: 251)   14,370 controls (current: 7,455; recent past: 3,008)] | Cases, insulin: 76 (6.1); oral medication: 78 (6.6); none: 78 (7.0) | Cases, insulin: 47; oral medication: 51; none: 50 | Hospitalisation for hyperglycaemia [5 years]                              |
| Noordam, 2016 [29]<br>Netherlands | <ul style="list-style-type: none"> <li>• Aged <math>\geq 45</math> years with T2DM (classified by oral GLDs only) in a defined geographical area who agreed to participate.</li> </ul>                                                                                         | Routinely collected pharmacy data | Current and past SSRI and TCA prescription versus no AD prescription                                        | 1,677<br>[304 cases (current SSRI: 9; past SSRI: 32; current TCA: 8; past TCA: 40)   controls unclear]          | 72 (9.7)                                                            | 44                                                | First insulin prescription [NR]                                           |
| <b>CROSS-SECTIONAL STUDIES</b>    |                                                                                                                                                                                                                                                                                |                                   |                                                                                                             |                                                                                                                 |                                                                     |                                                   |                                                                           |
| Higgins, 2007 [30]<br>USA         | <ul style="list-style-type: none"> <li>• Men aged <math>\geq 40</math> years with T2DM, visiting a veterans treatment centre</li> <li>• Exclusions: prescribed ADs for neuropathy</li> </ul>                                                                                   | Survey                            | Any versus no AD prescription (treatment centre electronic records)                                         | 8,185<br>[1,598   6,587]                                                                                        | Depression: > 60: 43%;<br>No depression: > 60: 70%                  | 100                                               | CVD (through treatment centre electronic records)                         |
| Yekta, 2015 [33]<br>USA           | <ul style="list-style-type: none"> <li>• Aged 40-85 years with self-reported T2DM or HbA1c values <math>\geq 6.5\%</math>/48 mmol/mol.</li> <li>• Exclusions: prescribed insulin at diagnosis or blindness, eye infections, eye patches, or immunological disorders</li> </ul> | Annual national survey            | Any versus no AD prescription; self-report in interviews                                                    | 1,144<br>[186   958]                                                                                            | Median 64                                                           | 48                                                | Retinopathy (retinal imaging assessed by experienced graders)             |
| Kammer, 2016 [31]<br>USA          | <ul style="list-style-type: none"> <li>• Aged 40-79 years with self-reported T1DM and T2DM, attending community health clinics in low-income areas</li> <li>• Exclusions: did not provide a blood sample or sickle cell anaemia</li> </ul>                                     | Survey                            | SSRI, SNRI, TCA, other AD, or multiple AD prescription versus no AD prescription; self-report in interviews | 462<br>[92   370]                                                                                               | 40-49: 40%;<br>50-65: 48%;<br>>65: 12%                              | 14                                                | HbA1c (standardised measurements following interview)                     |
| Wake, 2016 [32]<br>Scotland       | <ul style="list-style-type: none"> <li>• People with T1DM and T2DM</li> </ul>                                                                                                                                                                                                  | National diabetes register        | Any versus no AP prescription                                                                               | 25,982 <sup>†</sup><br>[2,362   23,620] <sup>†</sup>                                                            | 64                                                                  | NR                                                | Retinopathy, HbA1c, systolic and diastolic blood pressure and cholesterol |

\*Mean age and standard deviation where reported unless otherwise stated

<sup>†</sup>Gives the number of people in the exposed (AD or AP) and unexposed (AD or AP) groups, with more detailed subgroups or cases and controls specified where applicable

<sup>‡</sup>Maximum follow-up time unless otherwise stated

<sup>¶</sup>Exposed patients matched 1:10 to unexposed controls; total number of participants and number of participants unexposed deduced from this

AD: antidepressant; AP: antipsychotic; CHD: CV: cardiovascular; CVD cardiovascular disease; GLD: glucose lowering drug; HbA1c: glycated haemoglobin; IQR: interquartile range; LDL: low-density lipoprotein; MI: myocardial infarction; NR: not reported; SD: standard deviation; SE: standard error; SMI: severe mental illness; SNRI: selective norepinephrine reuptake inhibitor; SSRI: selective serotonin reuptake inhibitor; T1DM/T2DM: type 1/type 2 diabetes mellitus; TC: total cholesterol; TCA: tricyclic antidepressant



**Table 2:** Results of observational studies reporting on the association between antidepressant drug prescribing and outcomes in people with diabetes

| First author, year               | Statistical methods                          | Outcome                                                            | Reference             | Antidepressant prescription                                     | Results                                                                                                                                                                                                                          |                                                                      |
|----------------------------------|----------------------------------------------|--------------------------------------------------------------------|-----------------------|-----------------------------------------------------------------|----------------------------------------------------------------------------------------------------------------------------------------------------------------------------------------------------------------------------------|----------------------------------------------------------------------|
|                                  |                                              |                                                                    |                       |                                                                 | Effect estimate (CI)*                                                                                                                                                                                                            | Direction of association <sup>†</sup>                                |
| <i>COHORT STUDIES</i>            |                                              |                                                                    |                       |                                                                 |                                                                                                                                                                                                                                  |                                                                      |
| Rubin, 2010, 2013 <sup>†22</sup> | GEE                                          | Sub-optimal glycaemic control <sup>¶</sup> or insulin prescription | No AD                 | AD in prior year                                                | OR 1.13 (0.96-1.32)                                                                                                                                                                                                              | ↔                                                                    |
| Rådholm, 2015 [20]               | Descriptive                                  | First fatal or non-fatal MI                                        | No AD                 | AD (2 year run-in)                                              | <i>Men, 45-64 years:</i> 7.6 vs 6.0 per 1,000 years<br><i>Women, 45-64 years:</i> 5.4 vs 3.7 per 1,000 years<br><i>Men, 65-84 years:</i> 16.2 vs 12.6 per 1,000 years<br><i>Women, 65-84 years:</i> 13.3 vs 10.3 per 1,000 years | ↑ <sup>§</sup><br>↑ <sup>§</sup><br>↑ <sup>§</sup><br>↑ <sup>§</sup> |
| Brieler, 2016 [16]               | GEE                                          | Optimal glycaemic control <sup>¶</sup>                             | Depression with no AD | Depression with AD (4 year observation)                         | <b>OR 1.95 (1.02-3.71)</b>                                                                                                                                                                                                       | ↓ (of sub-optimal glycaemic control)                                 |
| Würtz, 2016 [26]                 | Cox proportional hazards                     | Mortality (30 days following stroke)                               | No SSRI               | Current SSRI (any)<br>New SSRI<br>Long-term SSRI<br>Former SSRI | <b>Rate ratio 1.3 (1.1-1.5)</b><br><b>Rate ratio 1.5 (1.2-1.8)</b><br><b>Rate ratio 1.2 (1.1-1.4)</b><br>Rate ratio 1.3 (1.0-1.7)                                                                                                | ↑<br>↑<br>↑<br>↔                                                     |
| Hazuda, 2019 <sup>¶</sup> [19]   | Cox proportional hazards                     | Composite: mortality and CVD                                       | No AD                 | Baseline AD**                                                   | <i>Men:</i> HR 0.95 (0.71-1.27)<br><b><i>Women:</i> HR 0.71 (0.53-0.95)</b>                                                                                                                                                      | ↔<br>↓                                                               |
| Chen, 2021[17]                   | Cox proportional hazards (of matched cohort) | First MI                                                           | No AD                 | No AD                                                           | <b>HR 0.68 (0.66-0.71)</b>                                                                                                                                                                                                       | ↓                                                                    |
| Rohde, 2021 [21]                 | Cox proportional hazards                     | Optimal glycaemic control <sup>¶</sup>                             | No AD                 | Current AD<br>Former AD                                         | OR 0.99 (0.93-1.06)<br><b>OR 1.07 (1.01-1.14)</b>                                                                                                                                                                                | ↔<br>↓ (of sub-optimal glycaemic control)                            |

|                                |                                 |                                                           |                                   |                         |                                                                |                |
|--------------------------------|---------------------------------|-----------------------------------------------------------|-----------------------------------|-------------------------|----------------------------------------------------------------|----------------|
|                                |                                 | GLD prescription (including insulin)                      | No AD                             | Current AD              | <b>OR 1.39 (1.34-1.44)</b>                                     | ↑              |
|                                |                                 |                                                           |                                   | Former AD               | <b>OR 1.35 (1.31-1.40)</b>                                     | ↑              |
| Wu, 2021 [25]                  | None                            | Incidence of diabetes complications & all-cause mortality | No AD                             | Macro complications     | 69.2 versus 65.6 per 1000 person-years                         | ↑ <sup>§</sup> |
|                                |                                 |                                                           |                                   | Micro complications     | 42.4 versus 40.9 per 1000 person-years                         | ↑ <sup>§</sup> |
|                                |                                 |                                                           |                                   | All-cause mortality     | 19.8 versus 17.3 per 1000 person-years                         | ↑ <sup>§</sup> |
| Chen 2022 [18]                 | Cox proportional hazards        | PAD                                                       | No SSRI                           | SSRI                    | HR 1.13 (0.76-1.69)                                            | ↔              |
| <b>SELF-CONTROLLED STUDIES</b> |                                 |                                                           |                                   |                         |                                                                |                |
| Rhode, 2022 [27]               | Mean percent change             | Mean HbA1c                                                | Pre-post AD initiation comparison |                         | -0.16% (95% CI, -0.18% - -0.13%)                               | ↓              |
|                                |                                 |                                                           |                                   |                         | Age-sex reference population: -0.03% (95% CI, -0.04% - -0.01%) | ↓              |
|                                |                                 | Mean LDL                                                  | Pre-post AD initiation comparison |                         | -0.17% (95% CI, -0.19% - -0.15%)                               | ↓              |
|                                |                                 |                                                           |                                   |                         | Age-sex reference population: -0.15% (95% CI, -0.16% - -0.13%) | ↓              |
| <b>CASE-CONTROL STUDIES</b>    |                                 |                                                           |                                   |                         |                                                                |                |
| Noordam, 2016 [29]             | Conditional logistic regression | Insulin prescription                                      | No AD                             | Current SSRI (any)      | HR 1.81 (0.89-3.71)                                            | ↔              |
|                                |                                 |                                                           |                                   | Current TCA (any)       | HR 1.40 (0.67-2.96)                                            | ↔              |
|                                |                                 |                                                           |                                   | Current SSRI (>90 days) | <b>HR 2.17 (1.02-4.60)</b>                                     | ↑              |
|                                |                                 |                                                           |                                   | Current TCA (>90 days)  | HR 1.90 (0.89-4.06)                                            | ↔              |
|                                |                                 |                                                           |                                   | Past SSRI               | HR 0.99 (0.65-1.51)                                            | ↔              |
|                                |                                 |                                                           |                                   | Past TCA                | HR 0.94 (0.65-1.38)                                            | ↔              |
| <b>CROSS-SECTIONAL STUDIES</b> |                                 |                                                           |                                   |                         |                                                                |                |
| Higgins, 2007 [30]             | Logistic regression             | Composite: CVD                                            | No AD                             | AD                      | <b>OR 1.19 (CI not available, P = 0.005)</b>                   | ↑              |
|                                |                                 | MI                                                        | No AD                             | AD                      | <b>OR 1.27 (CI not available, P = 0.011)</b>                   | ↑              |
| Yekta, 2015 [33]               | Logistic regression             | Retinopathy                                               | No AD                             | AD                      | <b>OR 0.48 (0.24-0.95)</b>                                     | ↓              |
|                                |                                 |                                                           |                                   |                         | <i>Without depression:</i> OR 0.61 (0.07-5.20)                 | ↔              |
|                                |                                 |                                                           |                                   |                         | <i>With depression:</i> <b>OR 0.41 (0.24-0.70)</b>             | ↓              |
| Kammer, 2016 [31]              | Linear regression               | Log HbA1c                                                 | No AD                             | SSRI                    | -0.03 (SE 0.04)                                                | ↔              |
|                                |                                 |                                                           |                                   | SNRI                    | -0.05 (SE 0.11)                                                | ↔              |
|                                |                                 |                                                           |                                   | TCA                     | -0.08 (SE 0.11)                                                | ↔              |
|                                |                                 |                                                           |                                   | Other                   | 0.03 (SE 0.10)                                                 | ↔              |

Multiple

**0.12 (SE 0.09)<sup>††</sup>**

↑

\* Results given for fully adjusted or matched models unless otherwise stated (full details of factors adjusted for given in supplementary table 4); estimates in bold are statistically significant at the P < 0.05 level)

Denotes significant P < 0.05

<sup>†</sup> ↑ = increased risk of outcome; ↓ = decreased risk of outcome; ↔ = no association (with statistical significance at the P < 0.05 level, unless otherwise stated)

<sup>‡</sup> Results given for the control arm (diabetes support and education) of the clinical trial from which the cohort is derived

<sup>¶</sup> Hba1C < 7%/53 mmol/mol

<sup>§</sup> Statistical comparisons not presented; significance not given

<sup>#</sup> Results given for the primary outcome

<sup>\*\*</sup> Authors state that similar results were obtained where analysing AD prescribing as a time-varying covariate (not reported)

<sup>††</sup> Standardised effect estimate 0.12 reported to translate into a Hba1c effect of 1.26%/13.8 mmol/mol

AD: antidepressant; AP: antipsychotic; BMI: body mass index; CCI: Charlson Comorbidity Index; CI: confidence interval; CV: cardiovascular; CVD: cardiovascular disease; GEE: Generalised estimating equations; GLD: glucose lowering drug; HbA1c: glycated haemoglobin; HR: hazard ratio; HRT: hormone replacement therapy; LDL: low-density lipoprotein; MI: myocardial infarction; OR: odds ratio; SBP: systolic blood pressure; SE: standard error; SNRI: serotonin–norepinephrine reuptake inhibitor; SSRI: selective serotonin reuptake inhibitor; TCA: tricyclic antidepressant; TG: triglyceride

**Table 3:** Results of observational studies reporting on the association between antipsychotic drug prescribing and outcomes in people with diabetes

| First author, year             | Statistical methods                   | Outcome                            | Reference                            | Results                                 |                                                                                                                                   | Direction of association <sup>‡</sup> |
|--------------------------------|---------------------------------------|------------------------------------|--------------------------------------|-----------------------------------------|-----------------------------------------------------------------------------------------------------------------------------------|---------------------------------------|
|                                |                                       |                                    |                                      | Antipsychotic prescription              | Effect estimate (CI) <sup>†</sup>                                                                                                 |                                       |
| <b>COHORT STUDIES</b>          |                                       |                                    |                                      |                                         |                                                                                                                                   |                                       |
| Spoelstra, 2004 [23]           | Cox proportional hazards              | Insulin prescription               | No AP                                | AP within 2 years of diabetes diagnosis | 2 years post diagnosis<br><i>Adjusted for age and year: HR 2.0 (1.2-3.3)*</i><br><i>Adjusted for medication: HR 1.7 (1.0-3.0)</i> | ↑<br>↔                                |
| Wu, 2016 [24]                  | Cox proportional hazards <sup>¶</sup> | CV morbidity                       | No AP                                | Irregular AP                            | <b>HR 0.83 (0.70-0.98)*</b>                                                                                                       | ↓                                     |
|                                |                                       |                                    |                                      | Regular AP                              | <b>HR 0.80 (0.66-0.97)*</b>                                                                                                       | ↓                                     |
|                                |                                       | Microvascular morbidity            | No AP                                | Irregular AP                            | HR 0.99 (0.81-1.22)                                                                                                               | ↔                                     |
|                                |                                       |                                    |                                      | Regular AP                              | HR 0.83 (0.62-1.11)                                                                                                               | ↔                                     |
| All-cause mortality            | No AP                                 | Irregular AP                       | <b>HR 0.79 (0.69-0.90)*</b>          | ↓                                       |                                                                                                                                   |                                       |
|                                |                                       |                                    |                                      | Regular AP                              | <b>HR 0.73 (0.62-0.85)*</b>                                                                                                       | ↓                                     |
| <b>CASE-CONTROL STUDIES</b>    |                                       |                                    |                                      |                                         |                                                                                                                                   |                                       |
| Lipscombe, 2009 [28]           | Conditional logistic regression       | Hospitalisation for hyperglycaemia | Remote AP                            | Current AP (any)                        | RR 1.50 (1.29-1.74)                                                                                                               | ↑                                     |
|                                |                                       |                                    |                                      |                                         | <b>Insulin: RR 1.40 (1.06-1.84)*</b>                                                                                              | ↑                                     |
|                                |                                       |                                    |                                      |                                         | <b>Oral GLD: RR 1.36 (1.12-1.66)*</b>                                                                                             | ↑                                     |
|                                |                                       |                                    |                                      |                                         | <b>None: RR 2.43 (1.61-3.66)*</b>                                                                                                 | ↑                                     |
|                                |                                       |                                    |                                      | Current AP (first time)                 | <b>Insulin: RR 15.4 (8.12-29.2)*</b>                                                                                              | ↑                                     |
|                                |                                       |                                    |                                      |                                         | <b>Oral GLD: RR 14.4 (8.71-23.8)*</b>                                                                                             | ↑                                     |
|                                |                                       |                                    |                                      |                                         | <b>None: RR 8.98 (2.56-31.5)*</b>                                                                                                 | ↑                                     |
| Current AP (prevalent)         | <b>Insulin: RR 1.36 (1.03-1.79)*</b>  | ↑                                  |                                      |                                         |                                                                                                                                   |                                       |
|                                | <b>Oral GLD: RR 1.31 (1.08-1.60)*</b> | ↑                                  |                                      |                                         |                                                                                                                                   |                                       |
|                                | <b>None: RR 2.23 (1.48-3.37)*</b>     | ↑                                  |                                      |                                         |                                                                                                                                   |                                       |
|                                |                                       | Recent past AP                     | <i>Insulin: RR 0.89 (0.63-1.27)</i>  | ↔                                       |                                                                                                                                   |                                       |
|                                |                                       |                                    | <i>Oral GLD: RR 1.04 (0.80-1.34)</i> | ↔                                       |                                                                                                                                   |                                       |
|                                |                                       |                                    | <i>None: RR 1.31 (0.76-2.27)</i>     | ↔                                       |                                                                                                                                   |                                       |
| <b>CROSS-SECTIONAL STUDIES</b> |                                       |                                    |                                      |                                         |                                                                                                                                   |                                       |
| Wake, 2016 [32]                | Student's t-test/chi-squared test     | Mean HbA1c (mmol/mol) ± SD         | AP (≥ 12 months in total)            |                                         | <b>55.1 ± 2.3*</b>                                                                                                                | ↓                                     |
|                                |                                       |                                    | No AP                                |                                         | 58.2 ± 1.3                                                                                                                        |                                       |
|                                |                                       | Retinopathy (prevalence, %)        | AP (≥ 12 months in total)            |                                         | <b>28*</b>                                                                                                                        | ↓                                     |
|                                |                                       |                                    | No AP                                |                                         | 32                                                                                                                                |                                       |

\*Denotes significant P < 0.05

<sup>†</sup>Results given for fully adjusted or matched models unless otherwise stated (full details of factors adjusted for given in supplementary table 4)

<sup>‡</sup>↑ = increased risk of outcome; ↓ = decreased risk of outcome; ↔ = no association (with statistical significance at the P < 0.05 level, unless otherwise stated)

<sup>¶</sup>Time-dependent with AP prescribing measured in 6 month intervals

AD: antidepressant; AP: antipsychotic; BMI: body mass index; CCI: Charlson Comorbidity Index; CI: confidence interval; CV: cardiovascular; GLD: glucose lowering drug; HbA1c: glycated haemoglobin; HR: hazard ratio; SD: standard deviation; RR: rate ratio

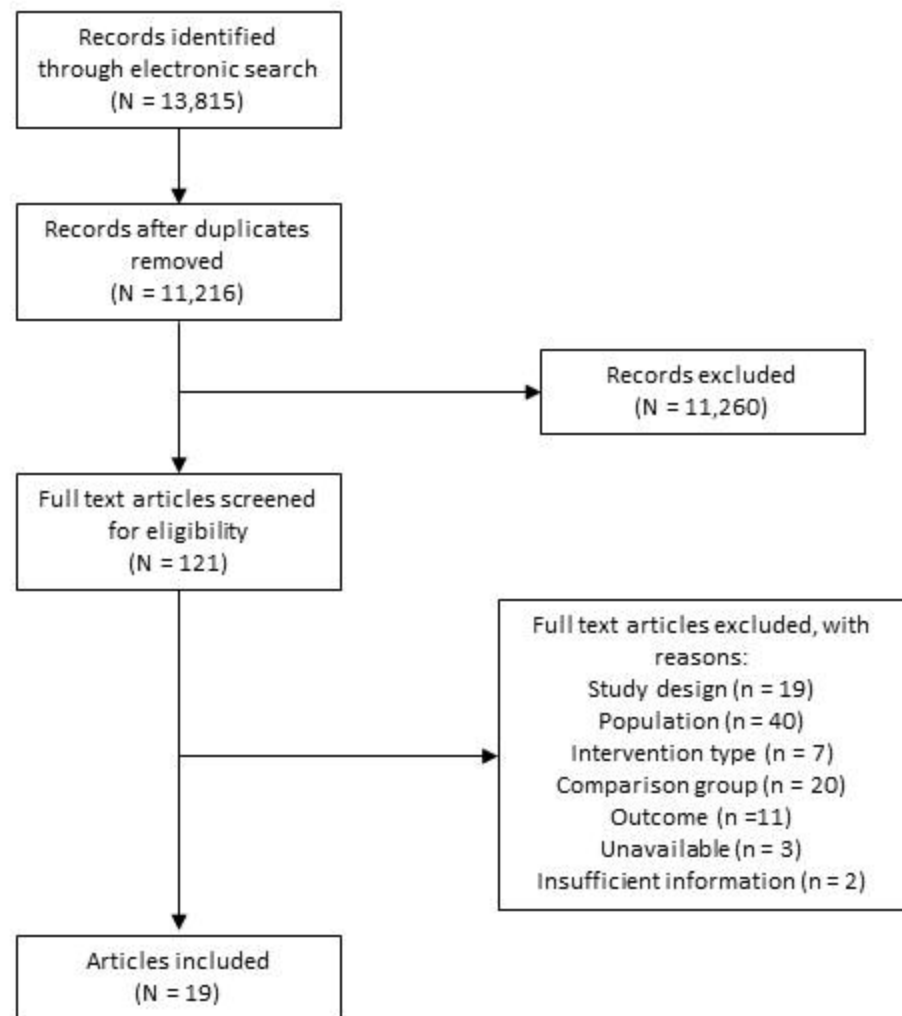

Source: https://medrxiv.org/content/10.1101/2023.01.27.23285097v1.full.pdf
